# Supplementary material for: Use of non-governmental maternity services and pregnancy outcomes among undocumented women: a cohort study from Norway
Source: Springer Nature journal article supplement (doi:10.1186/s12884-022-05112-0), 2022-10-24

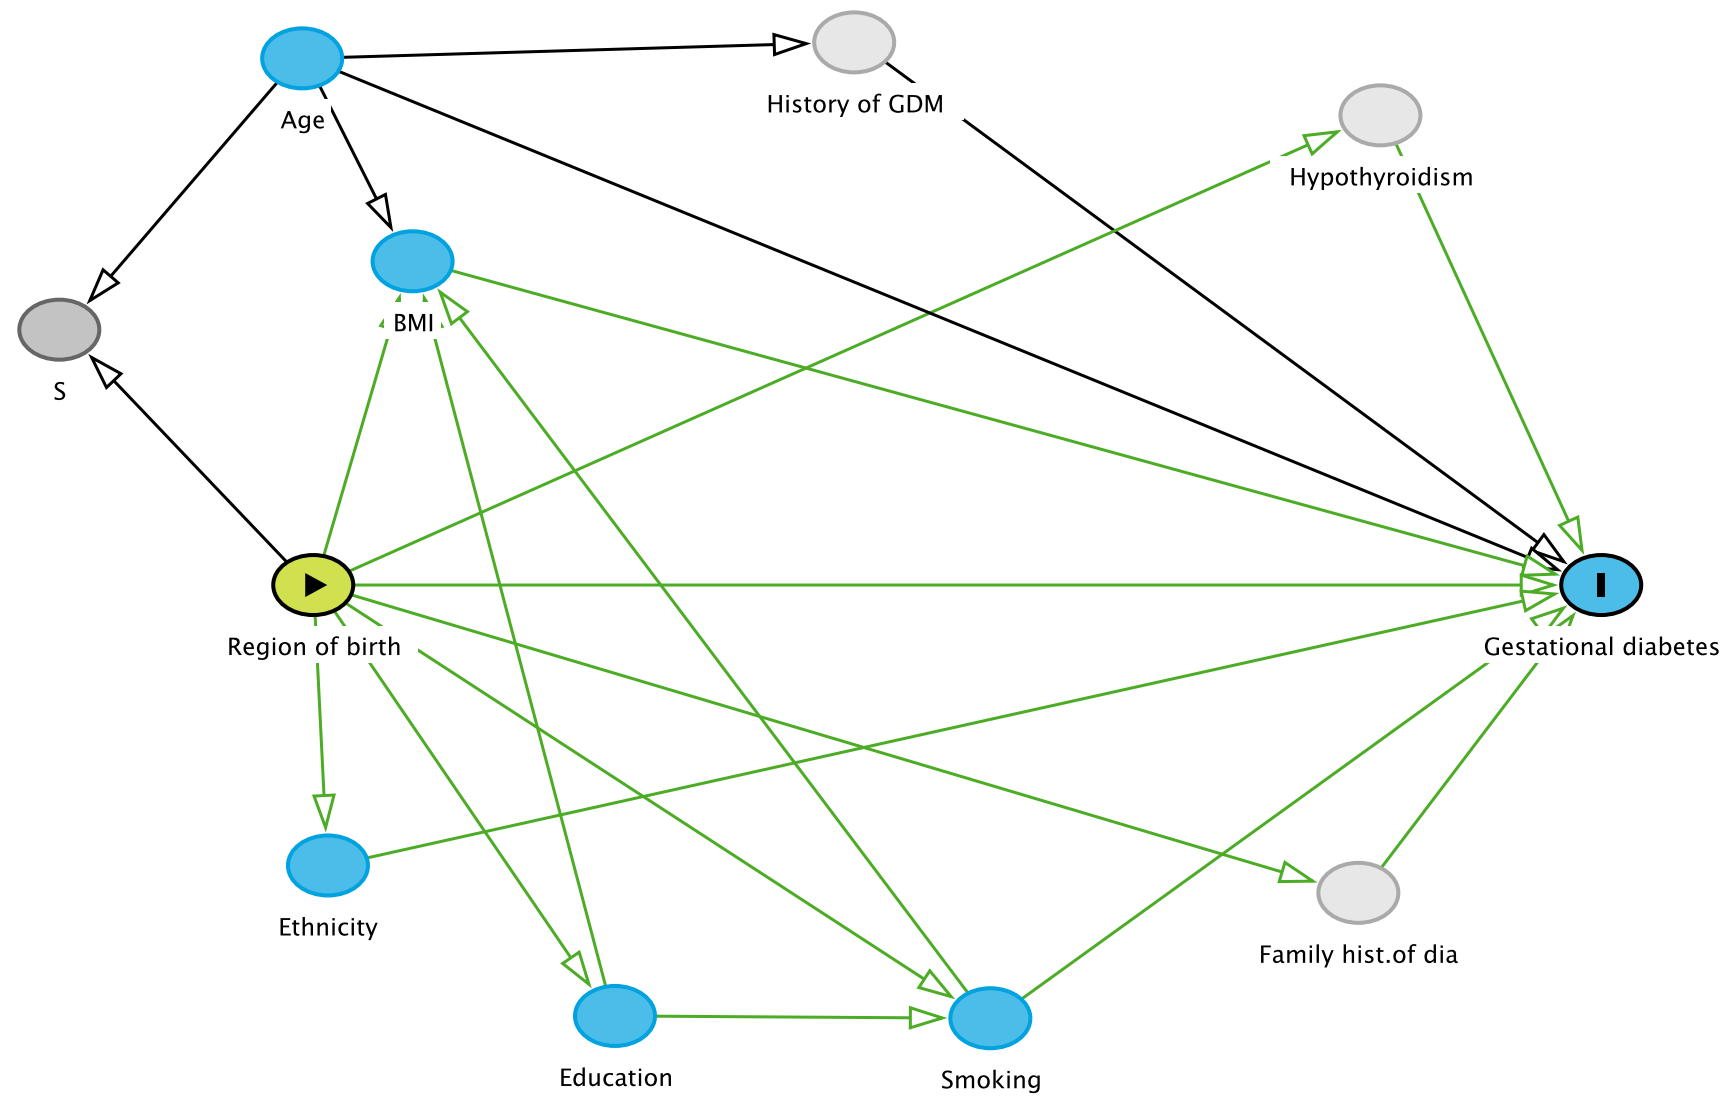

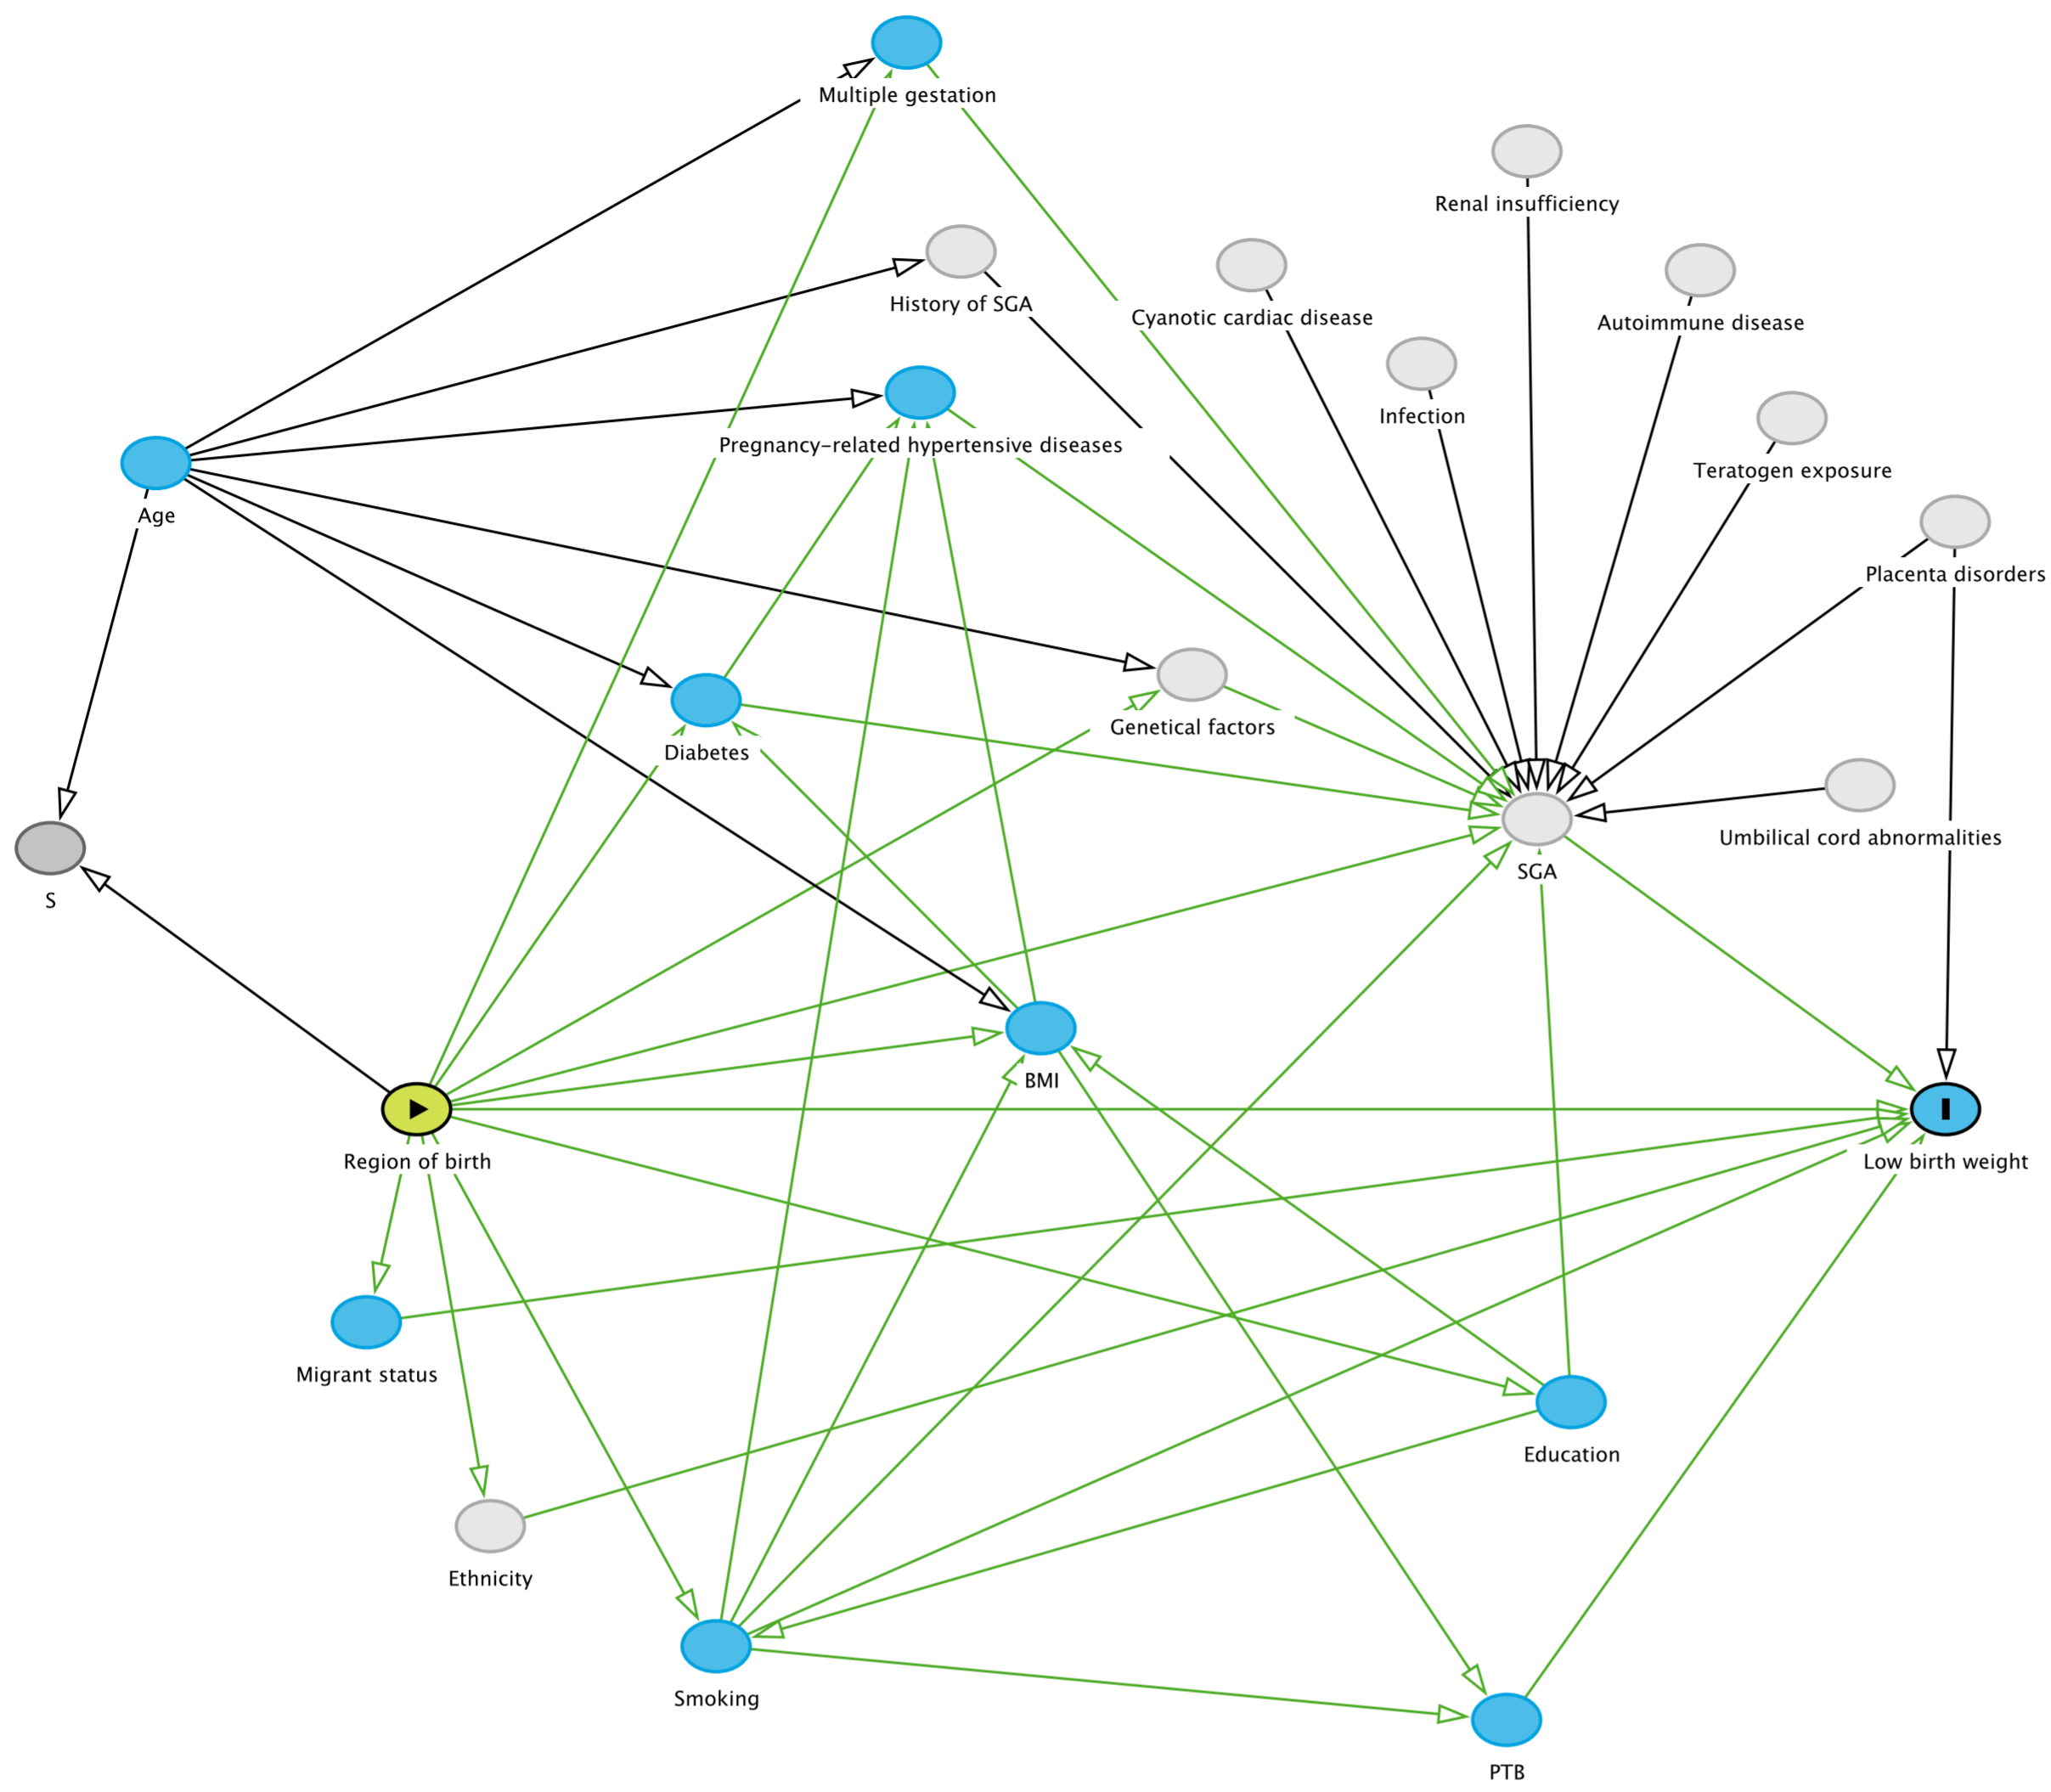

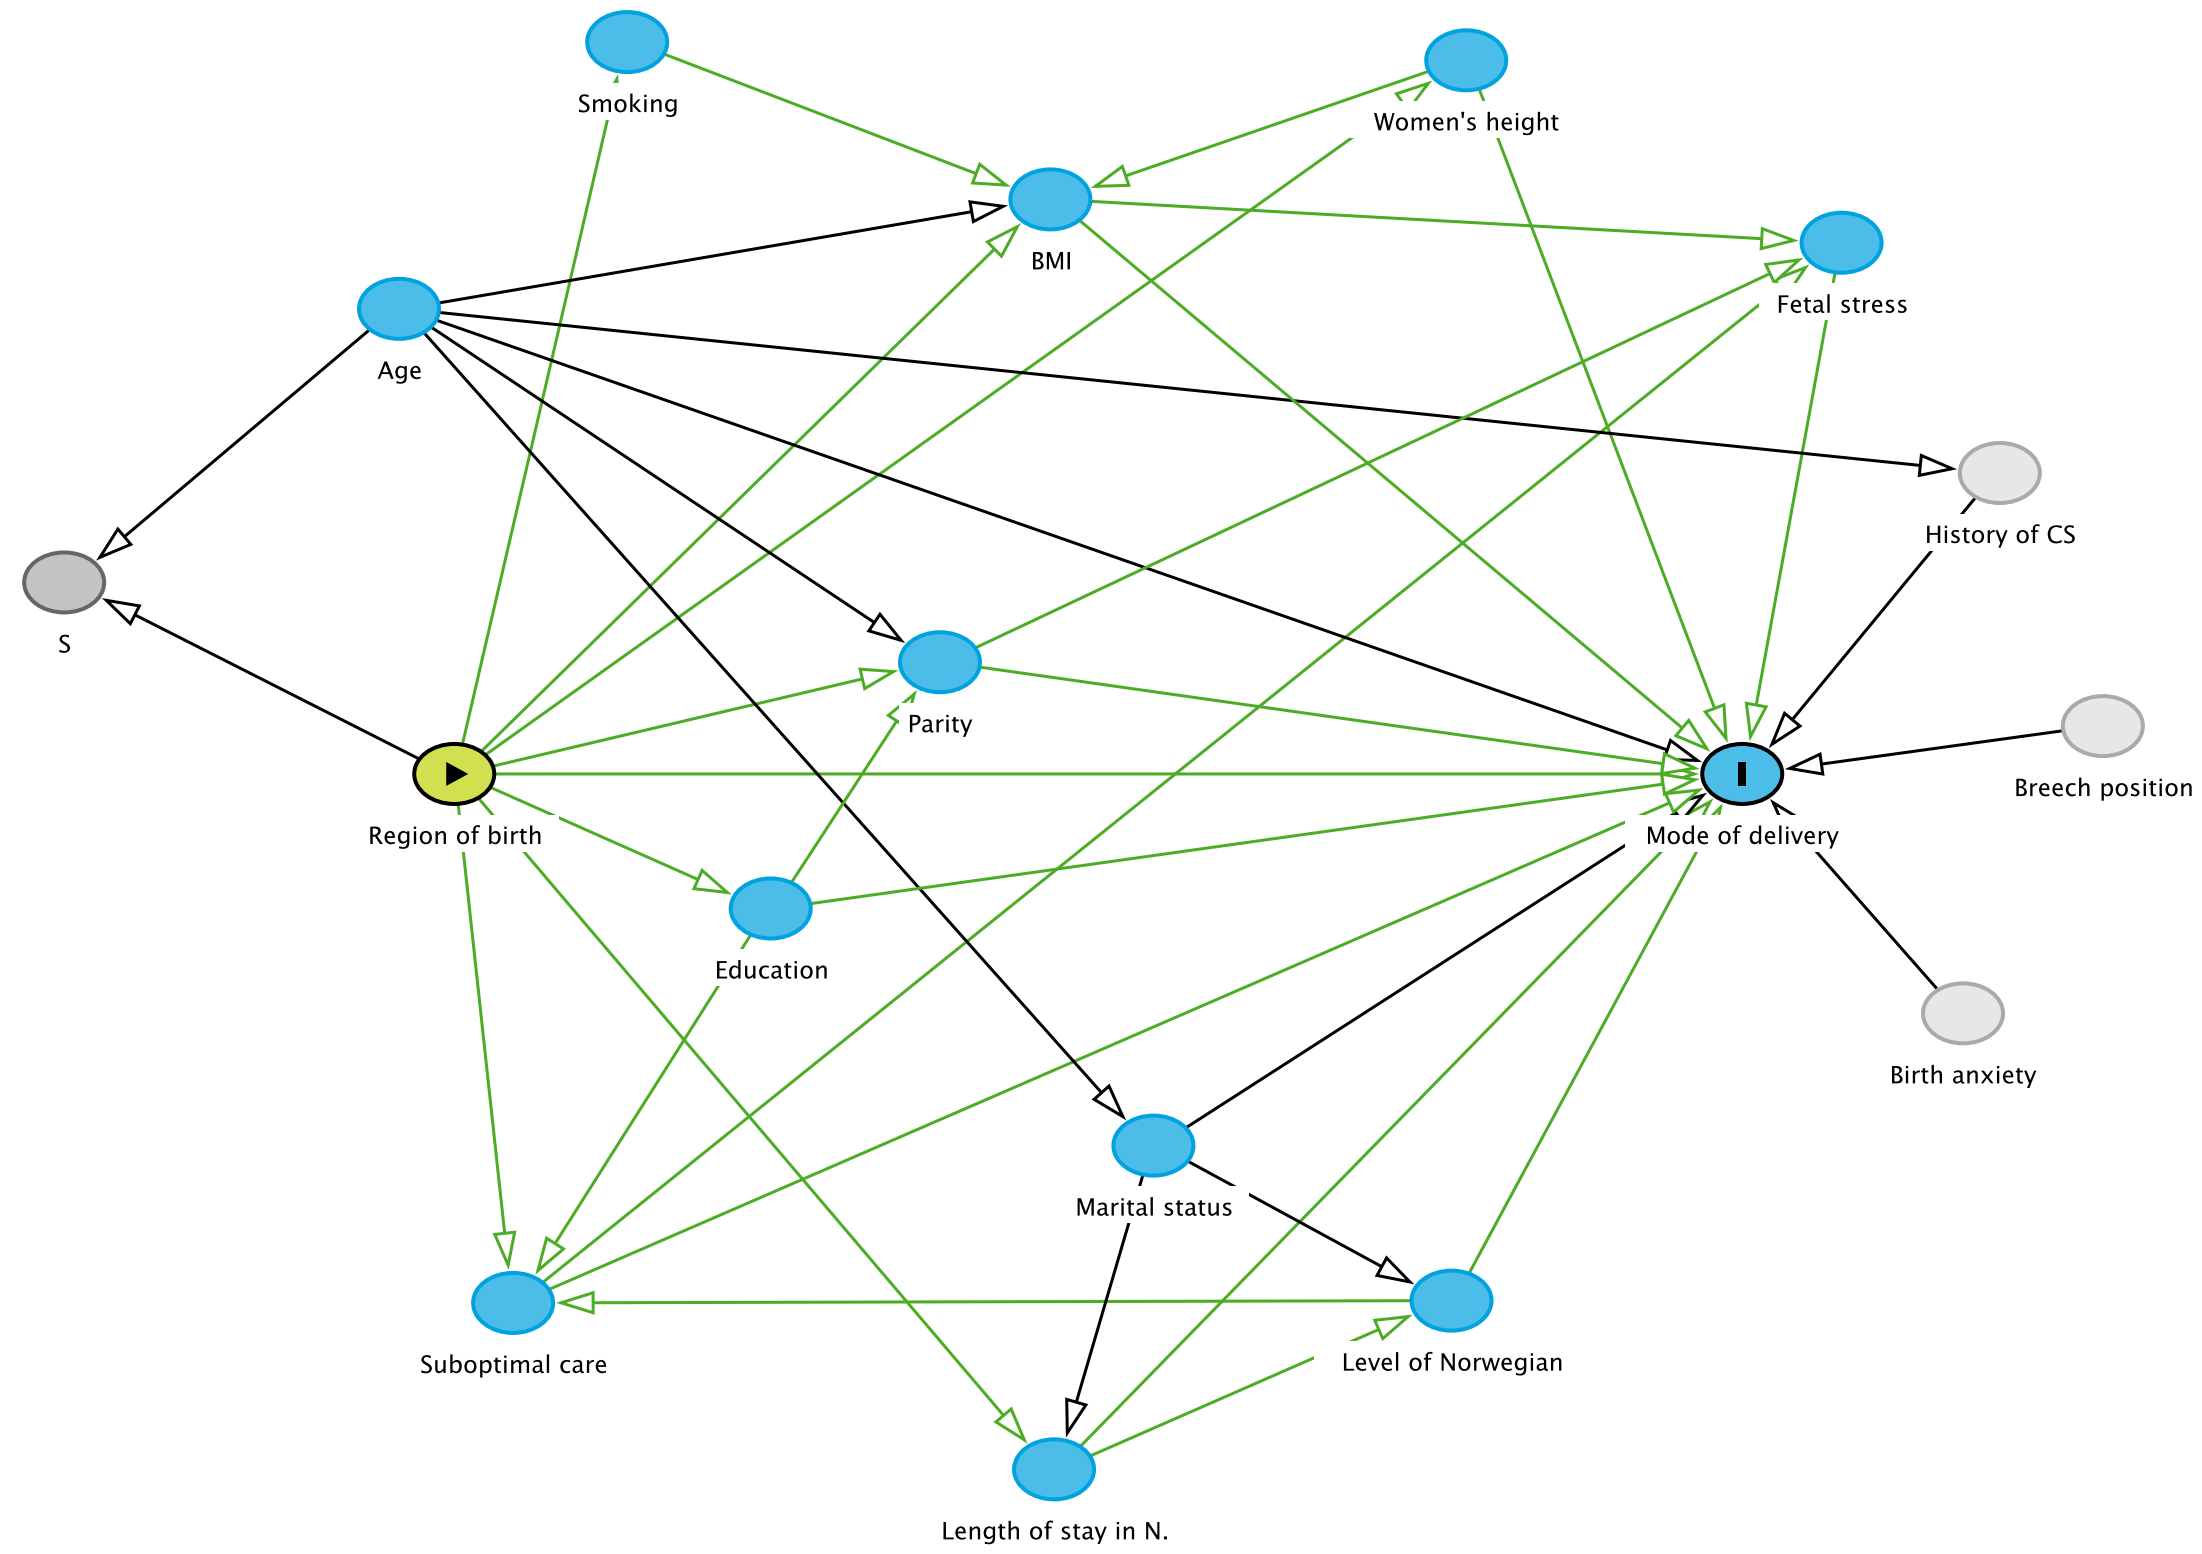

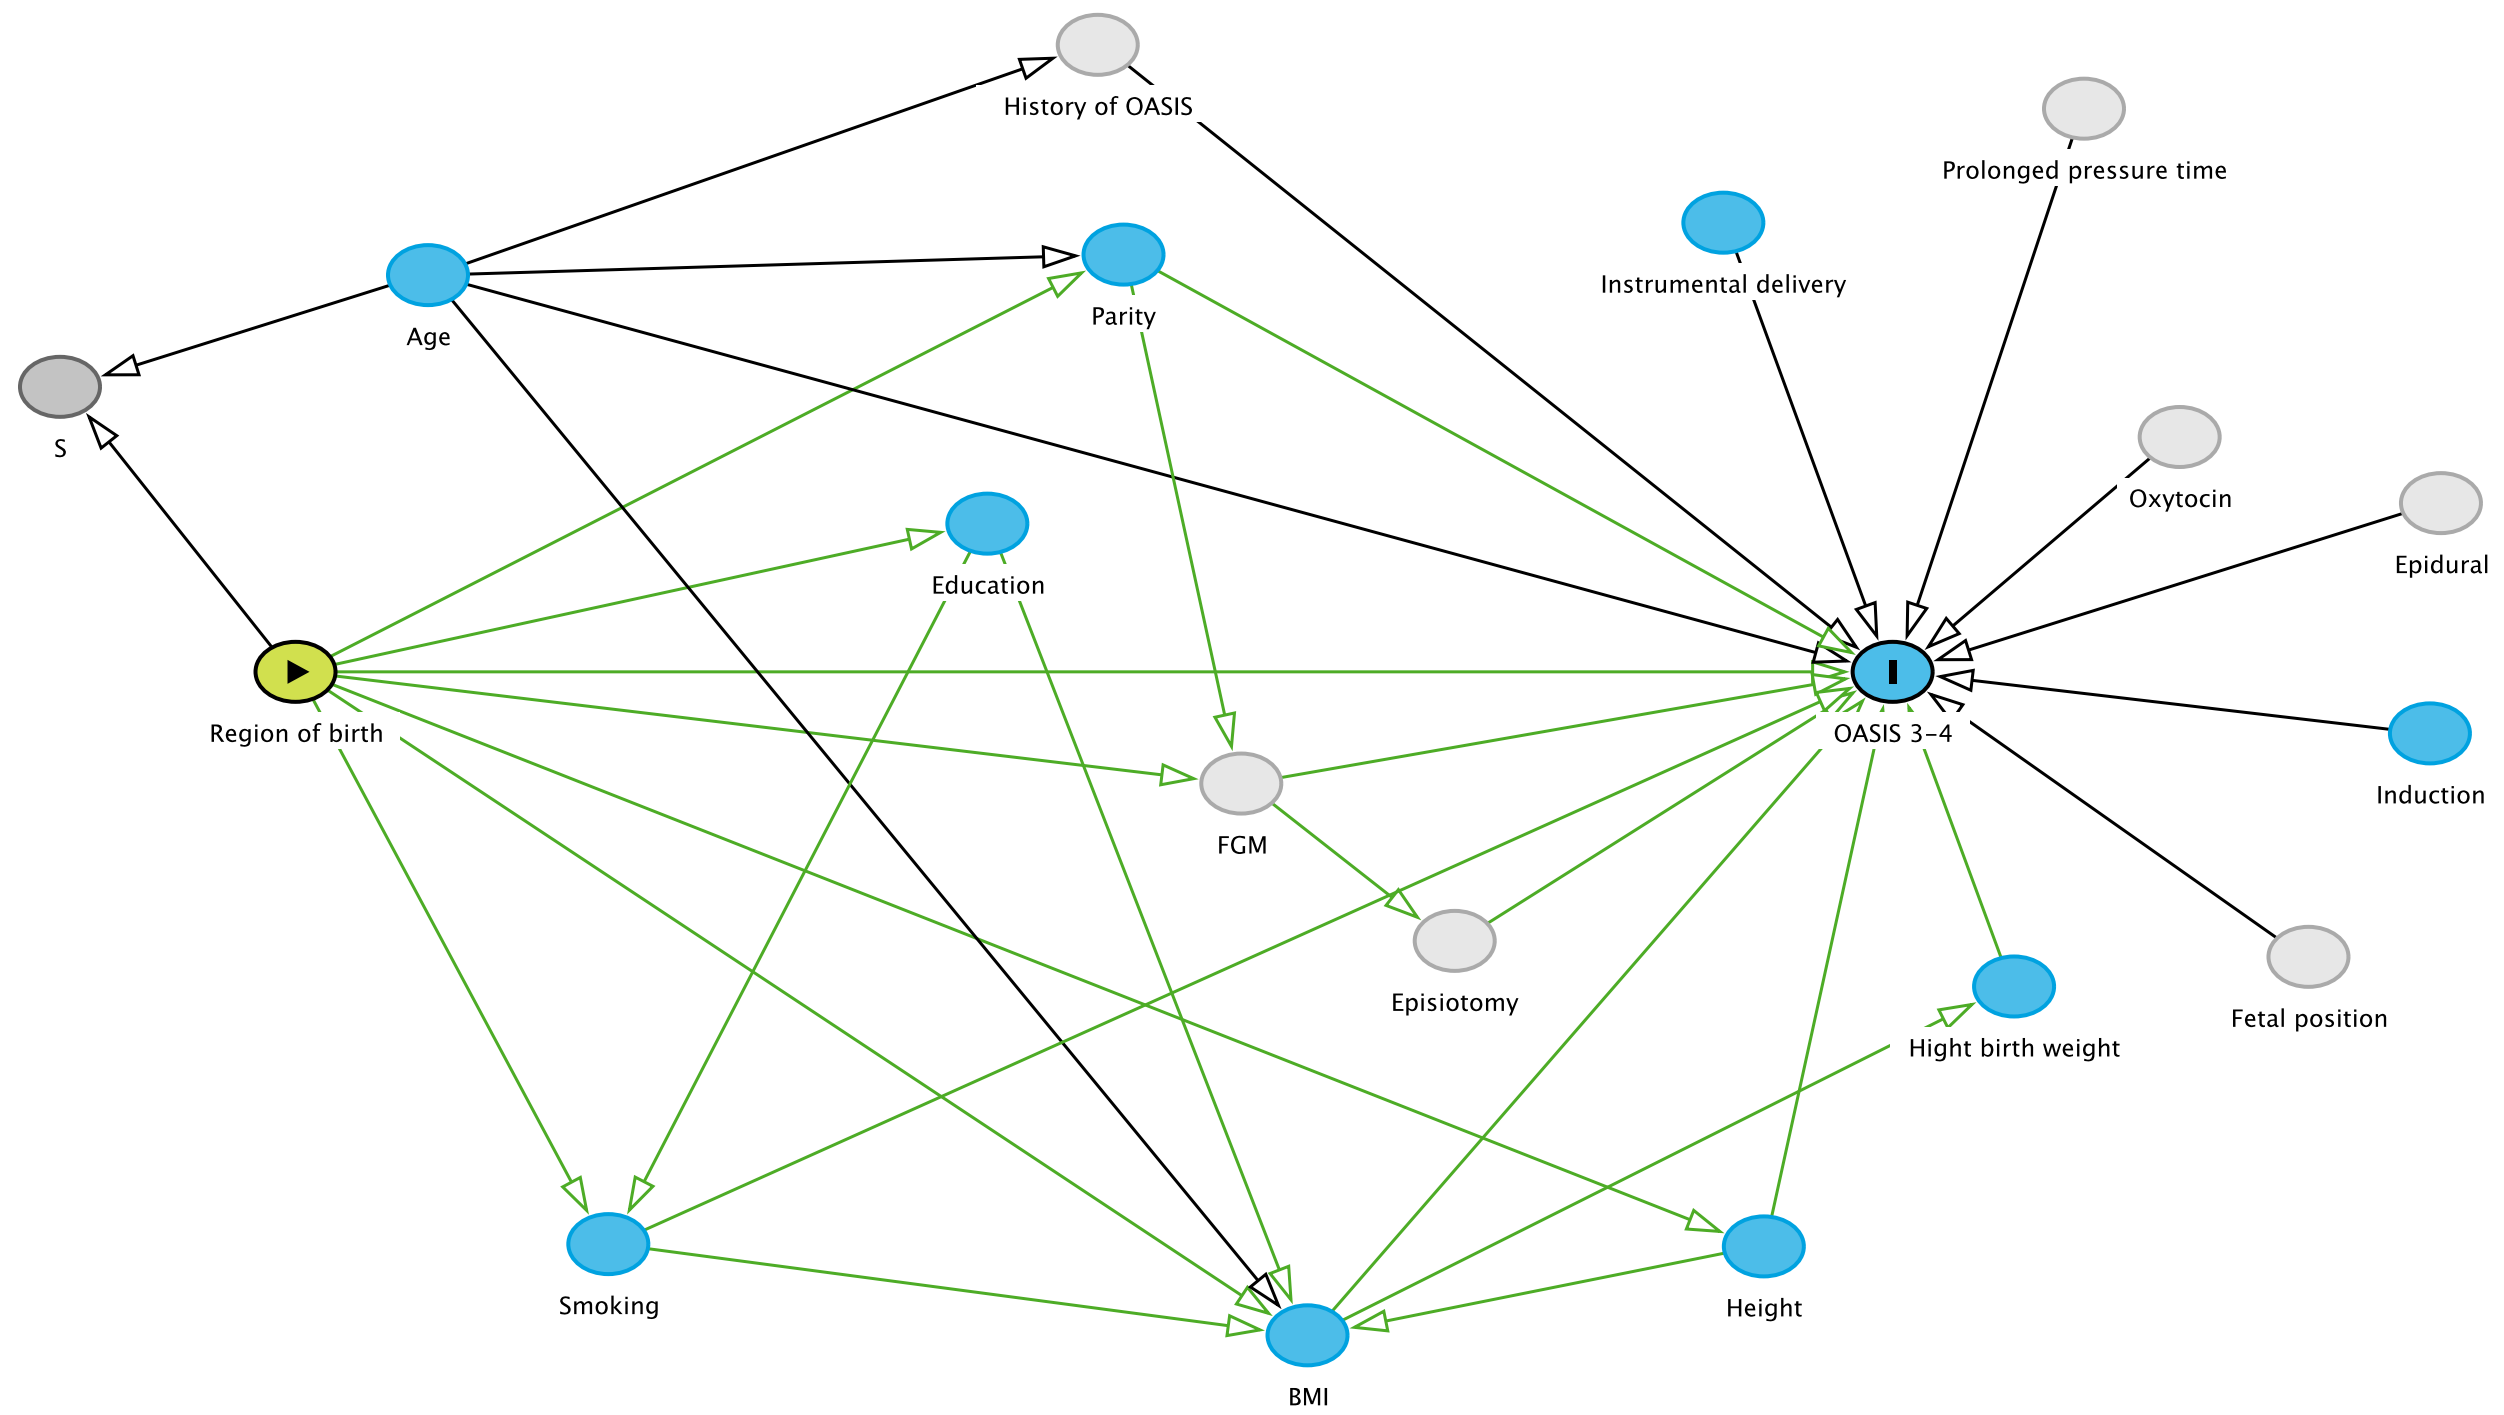

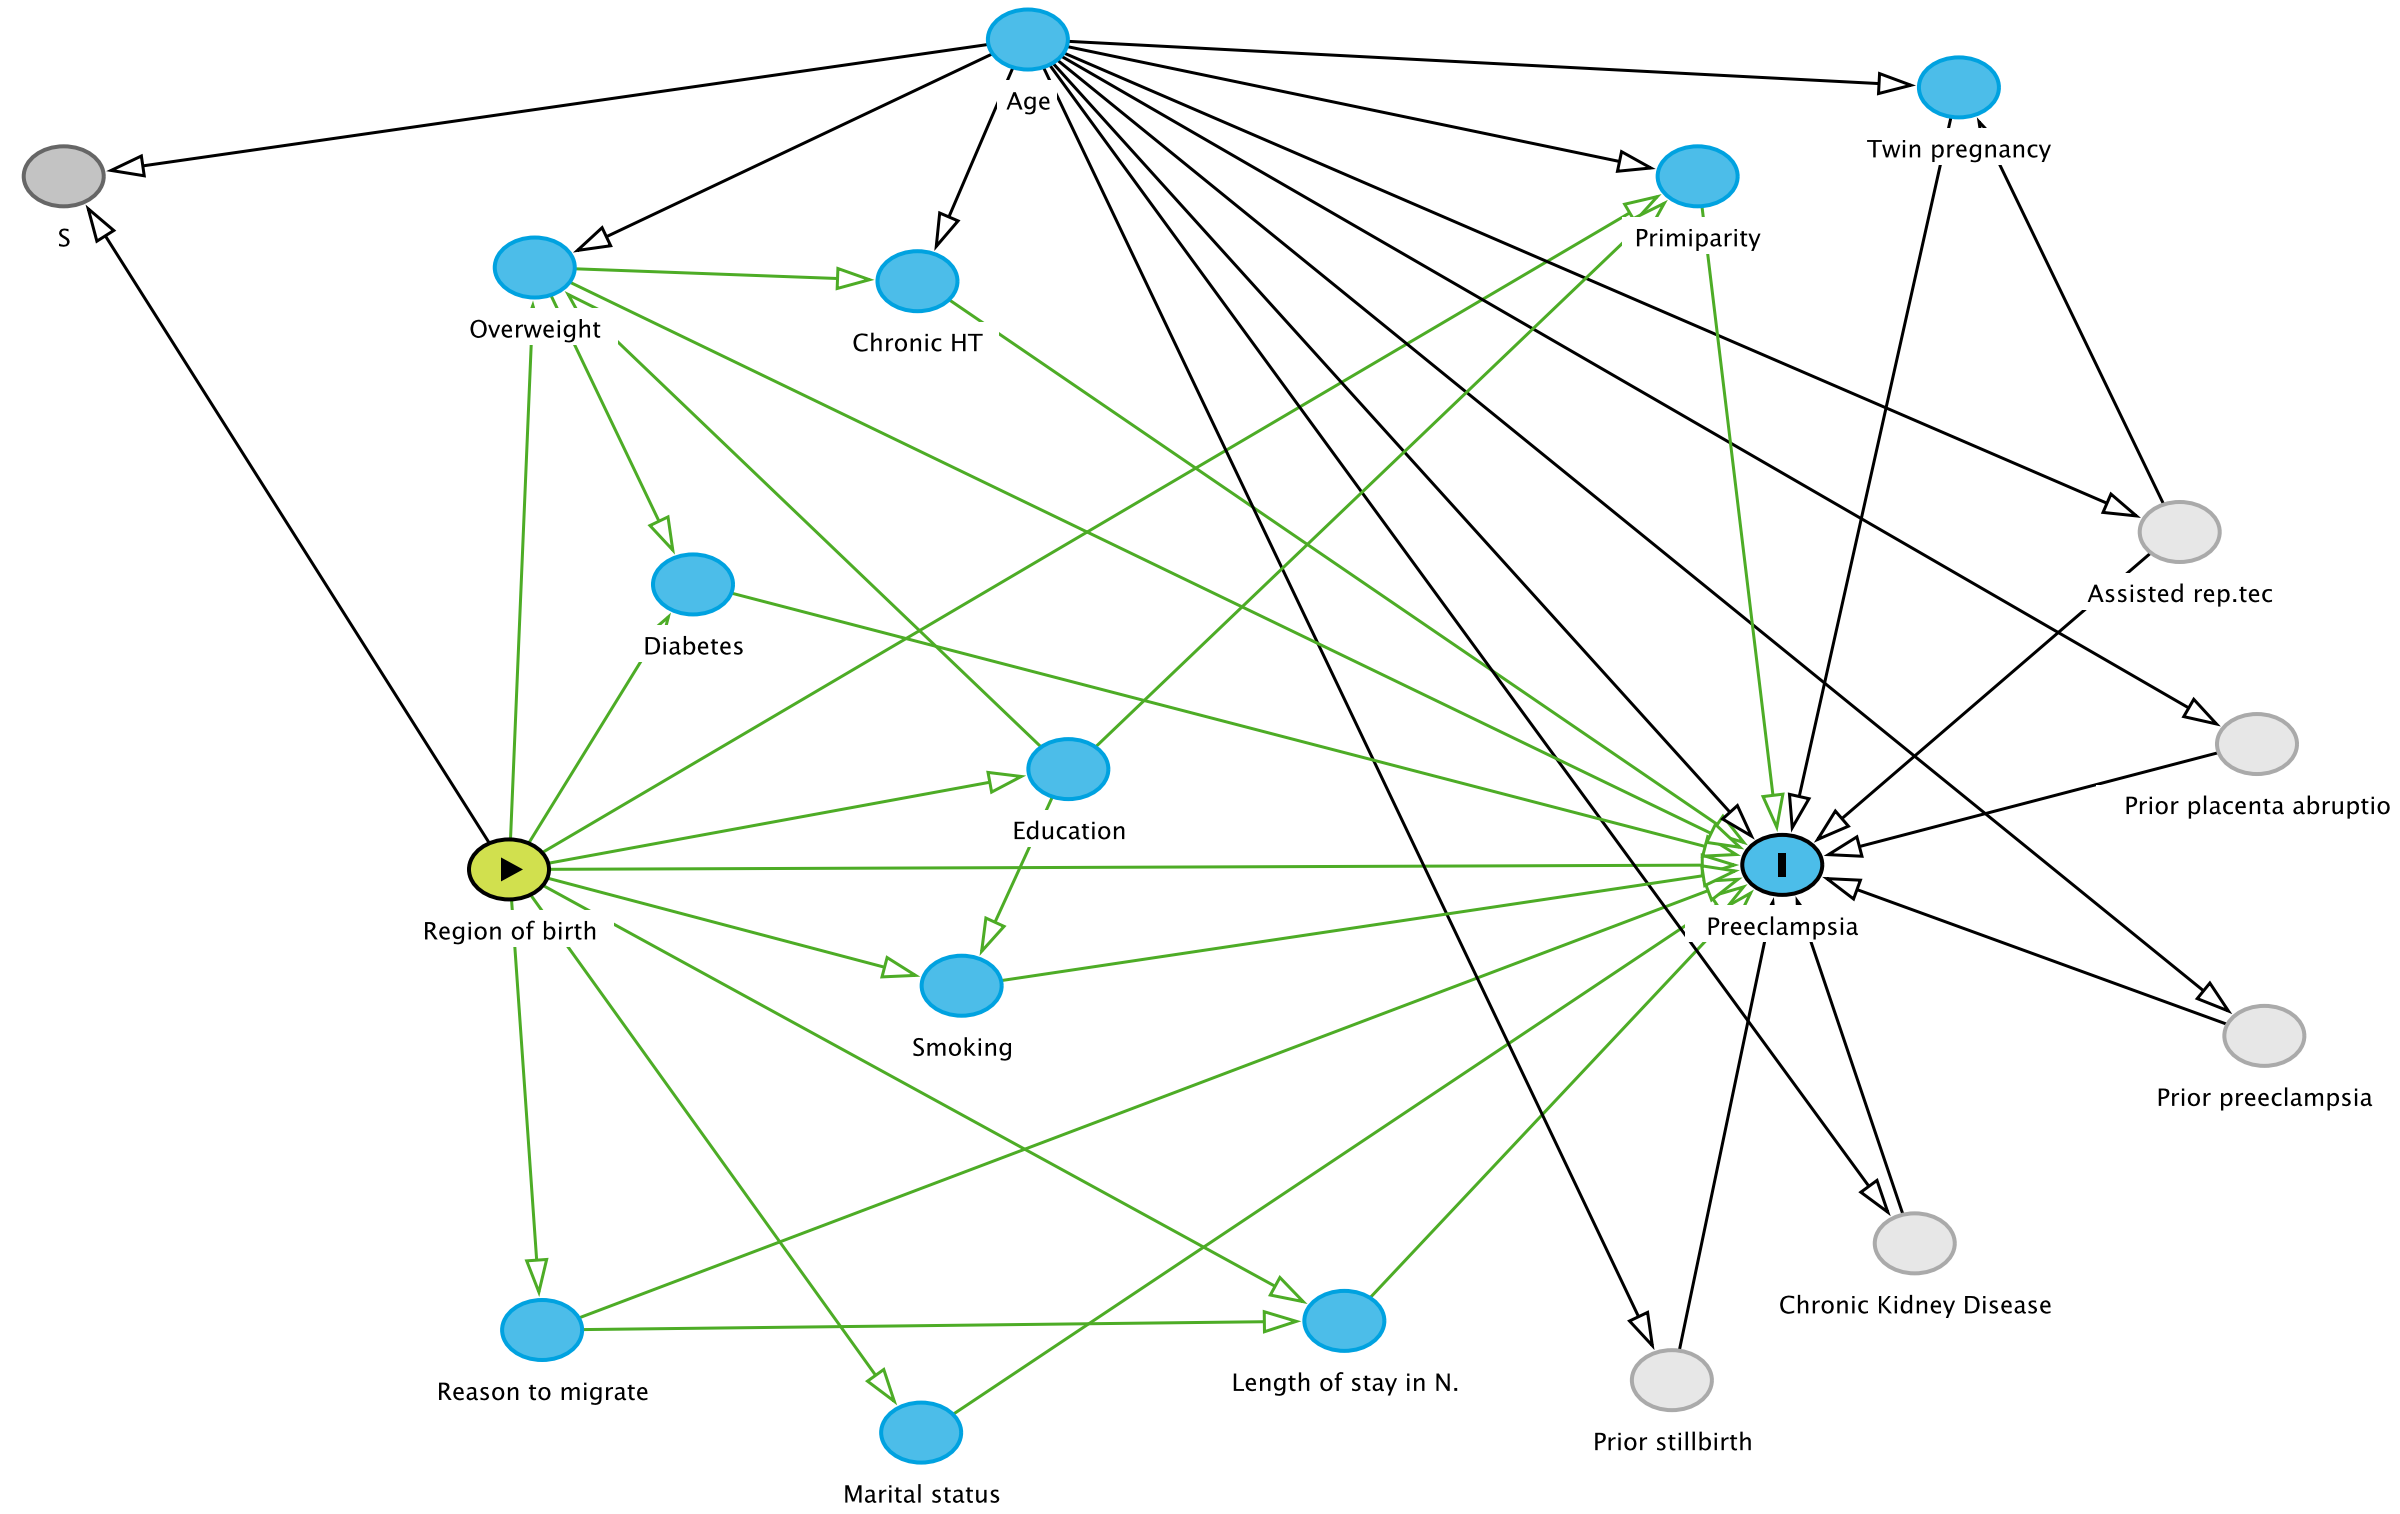

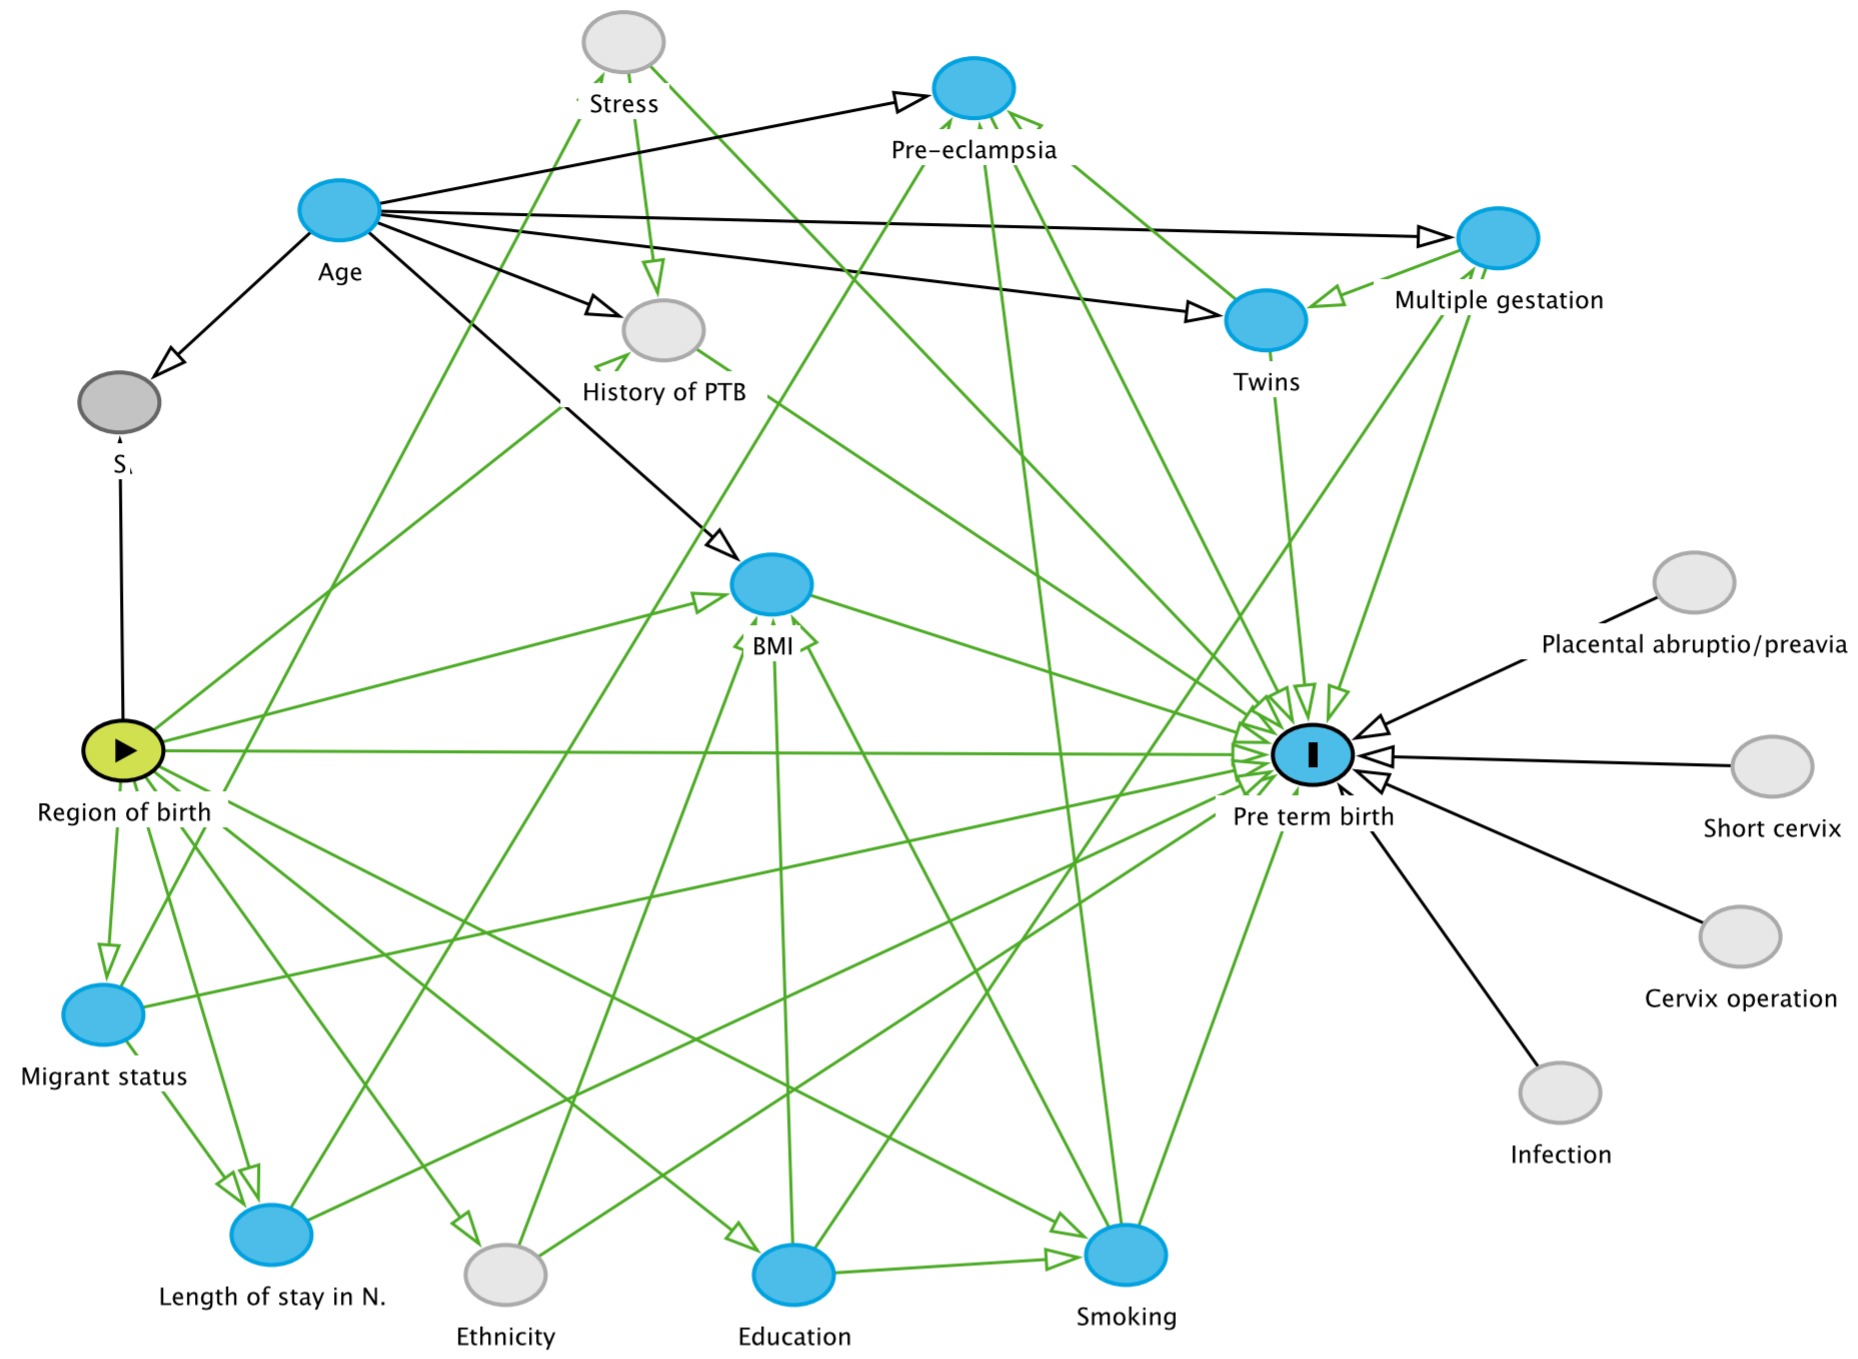

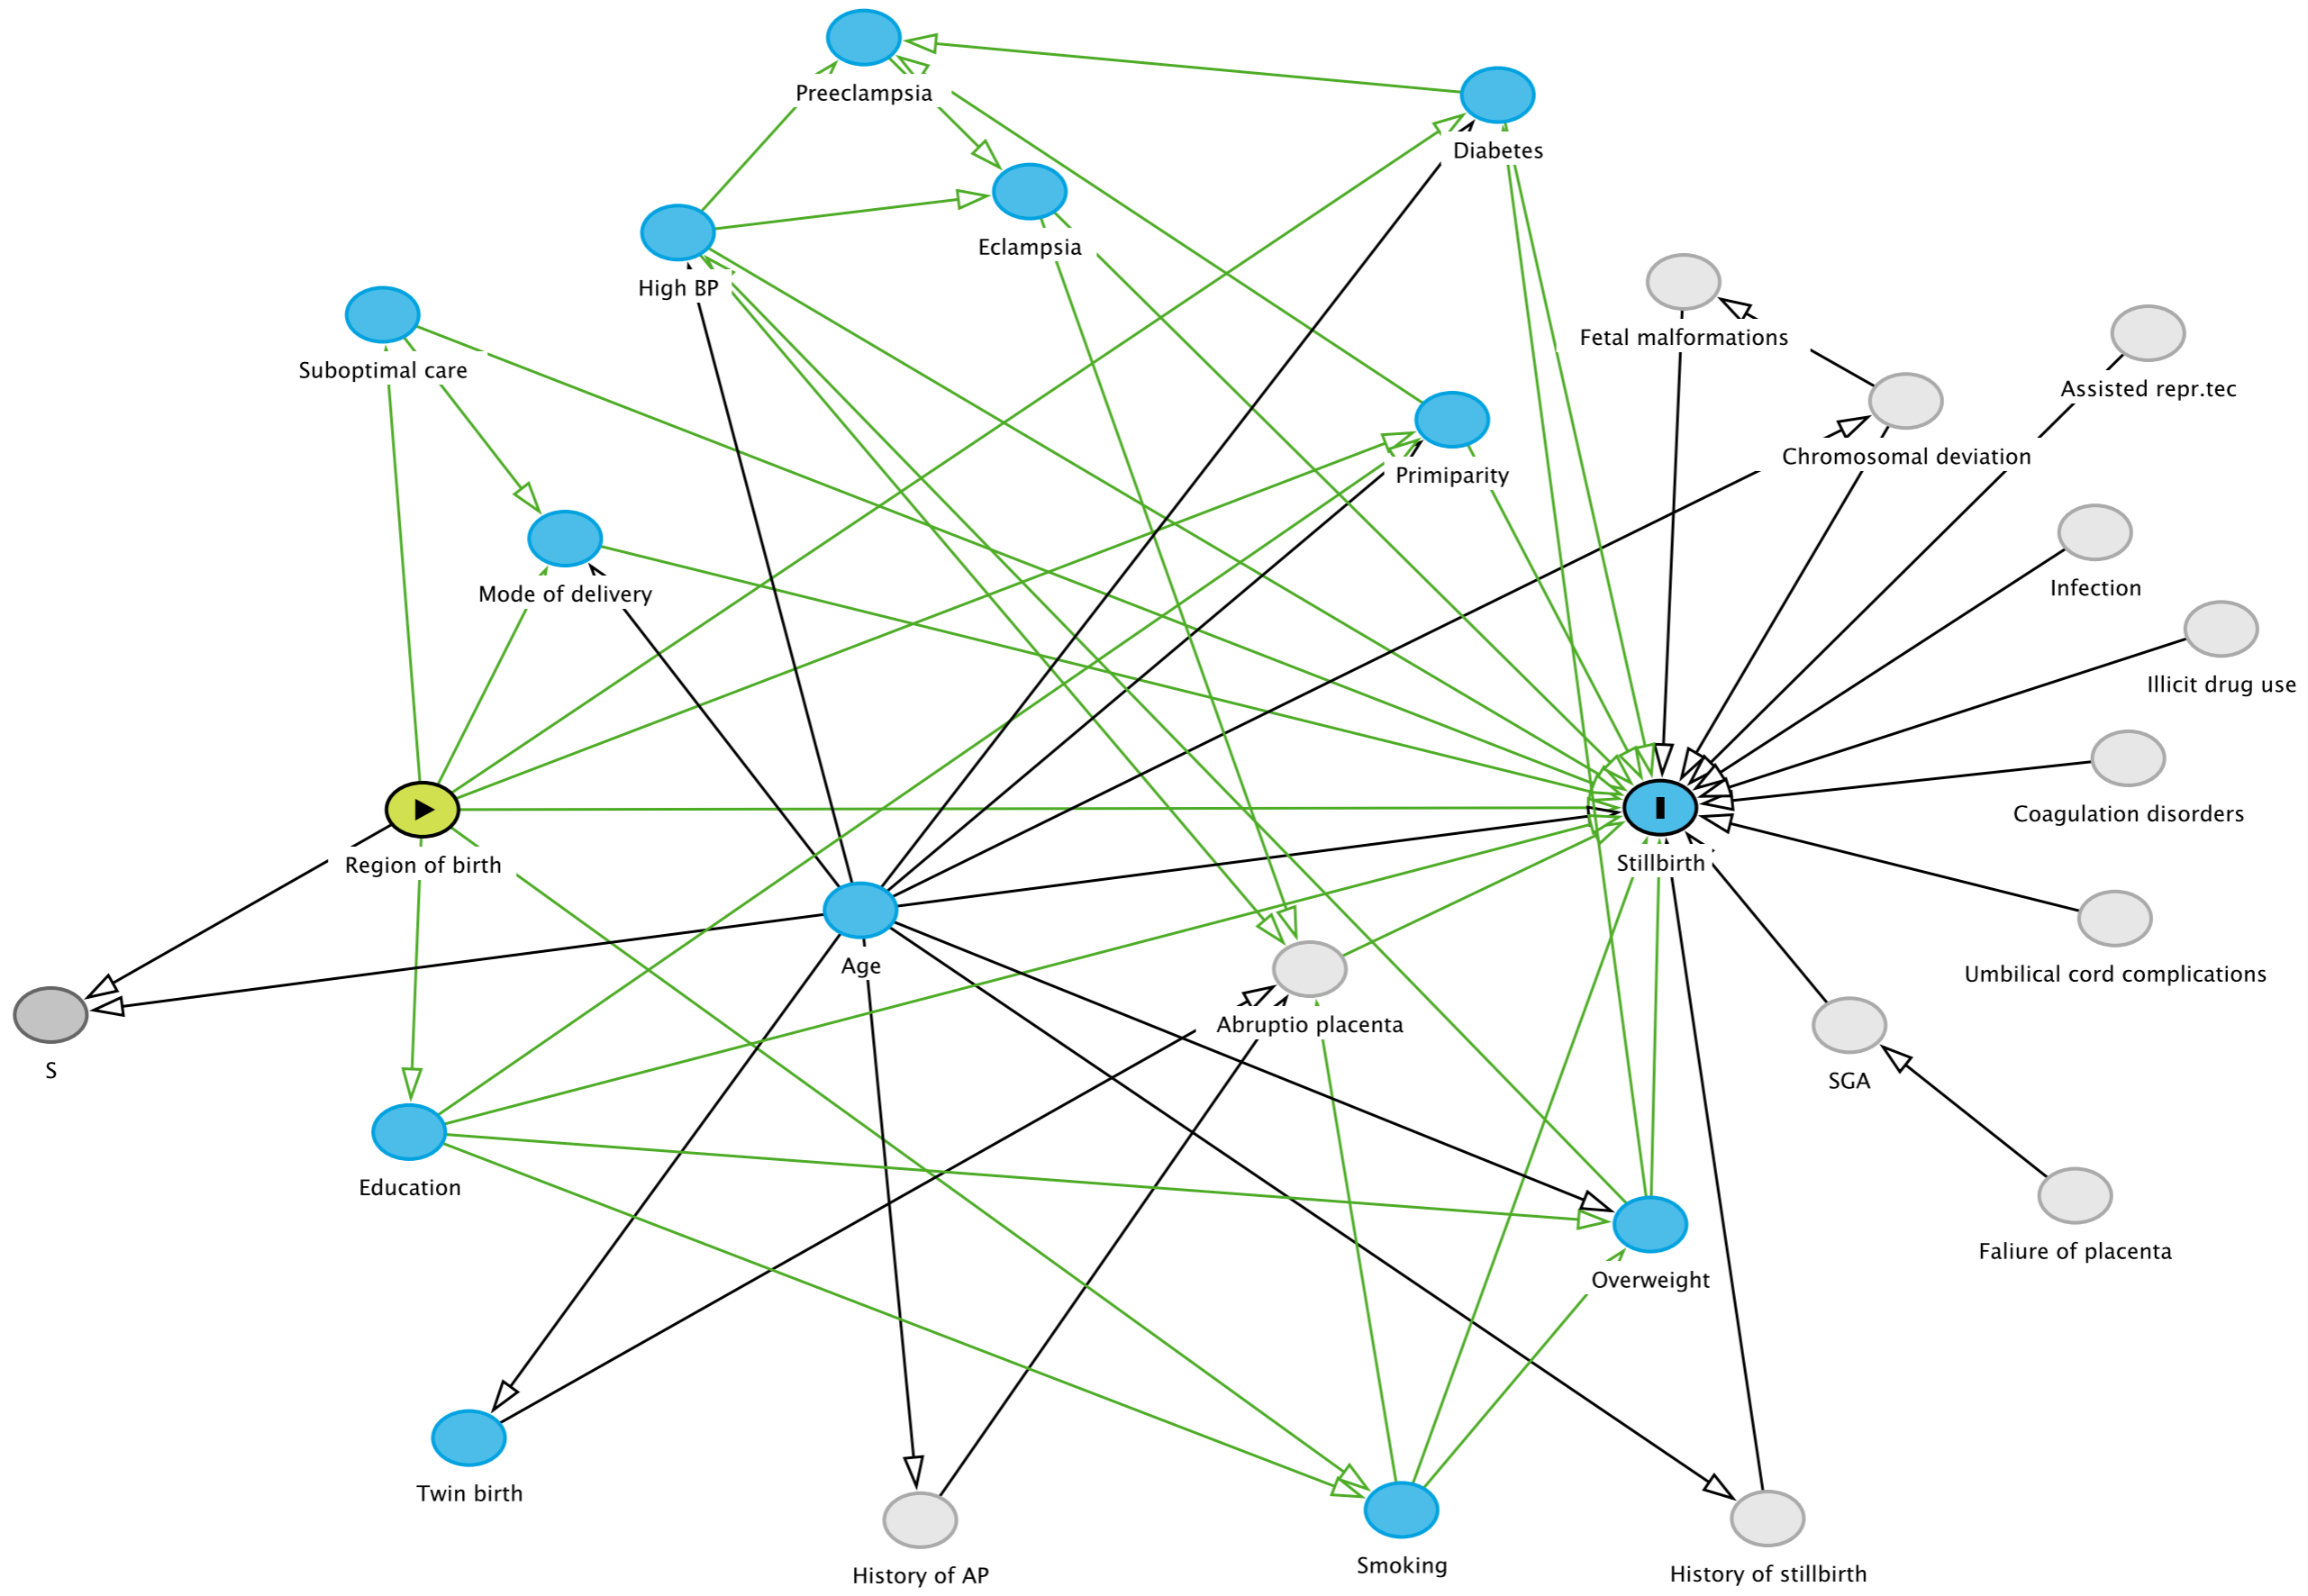

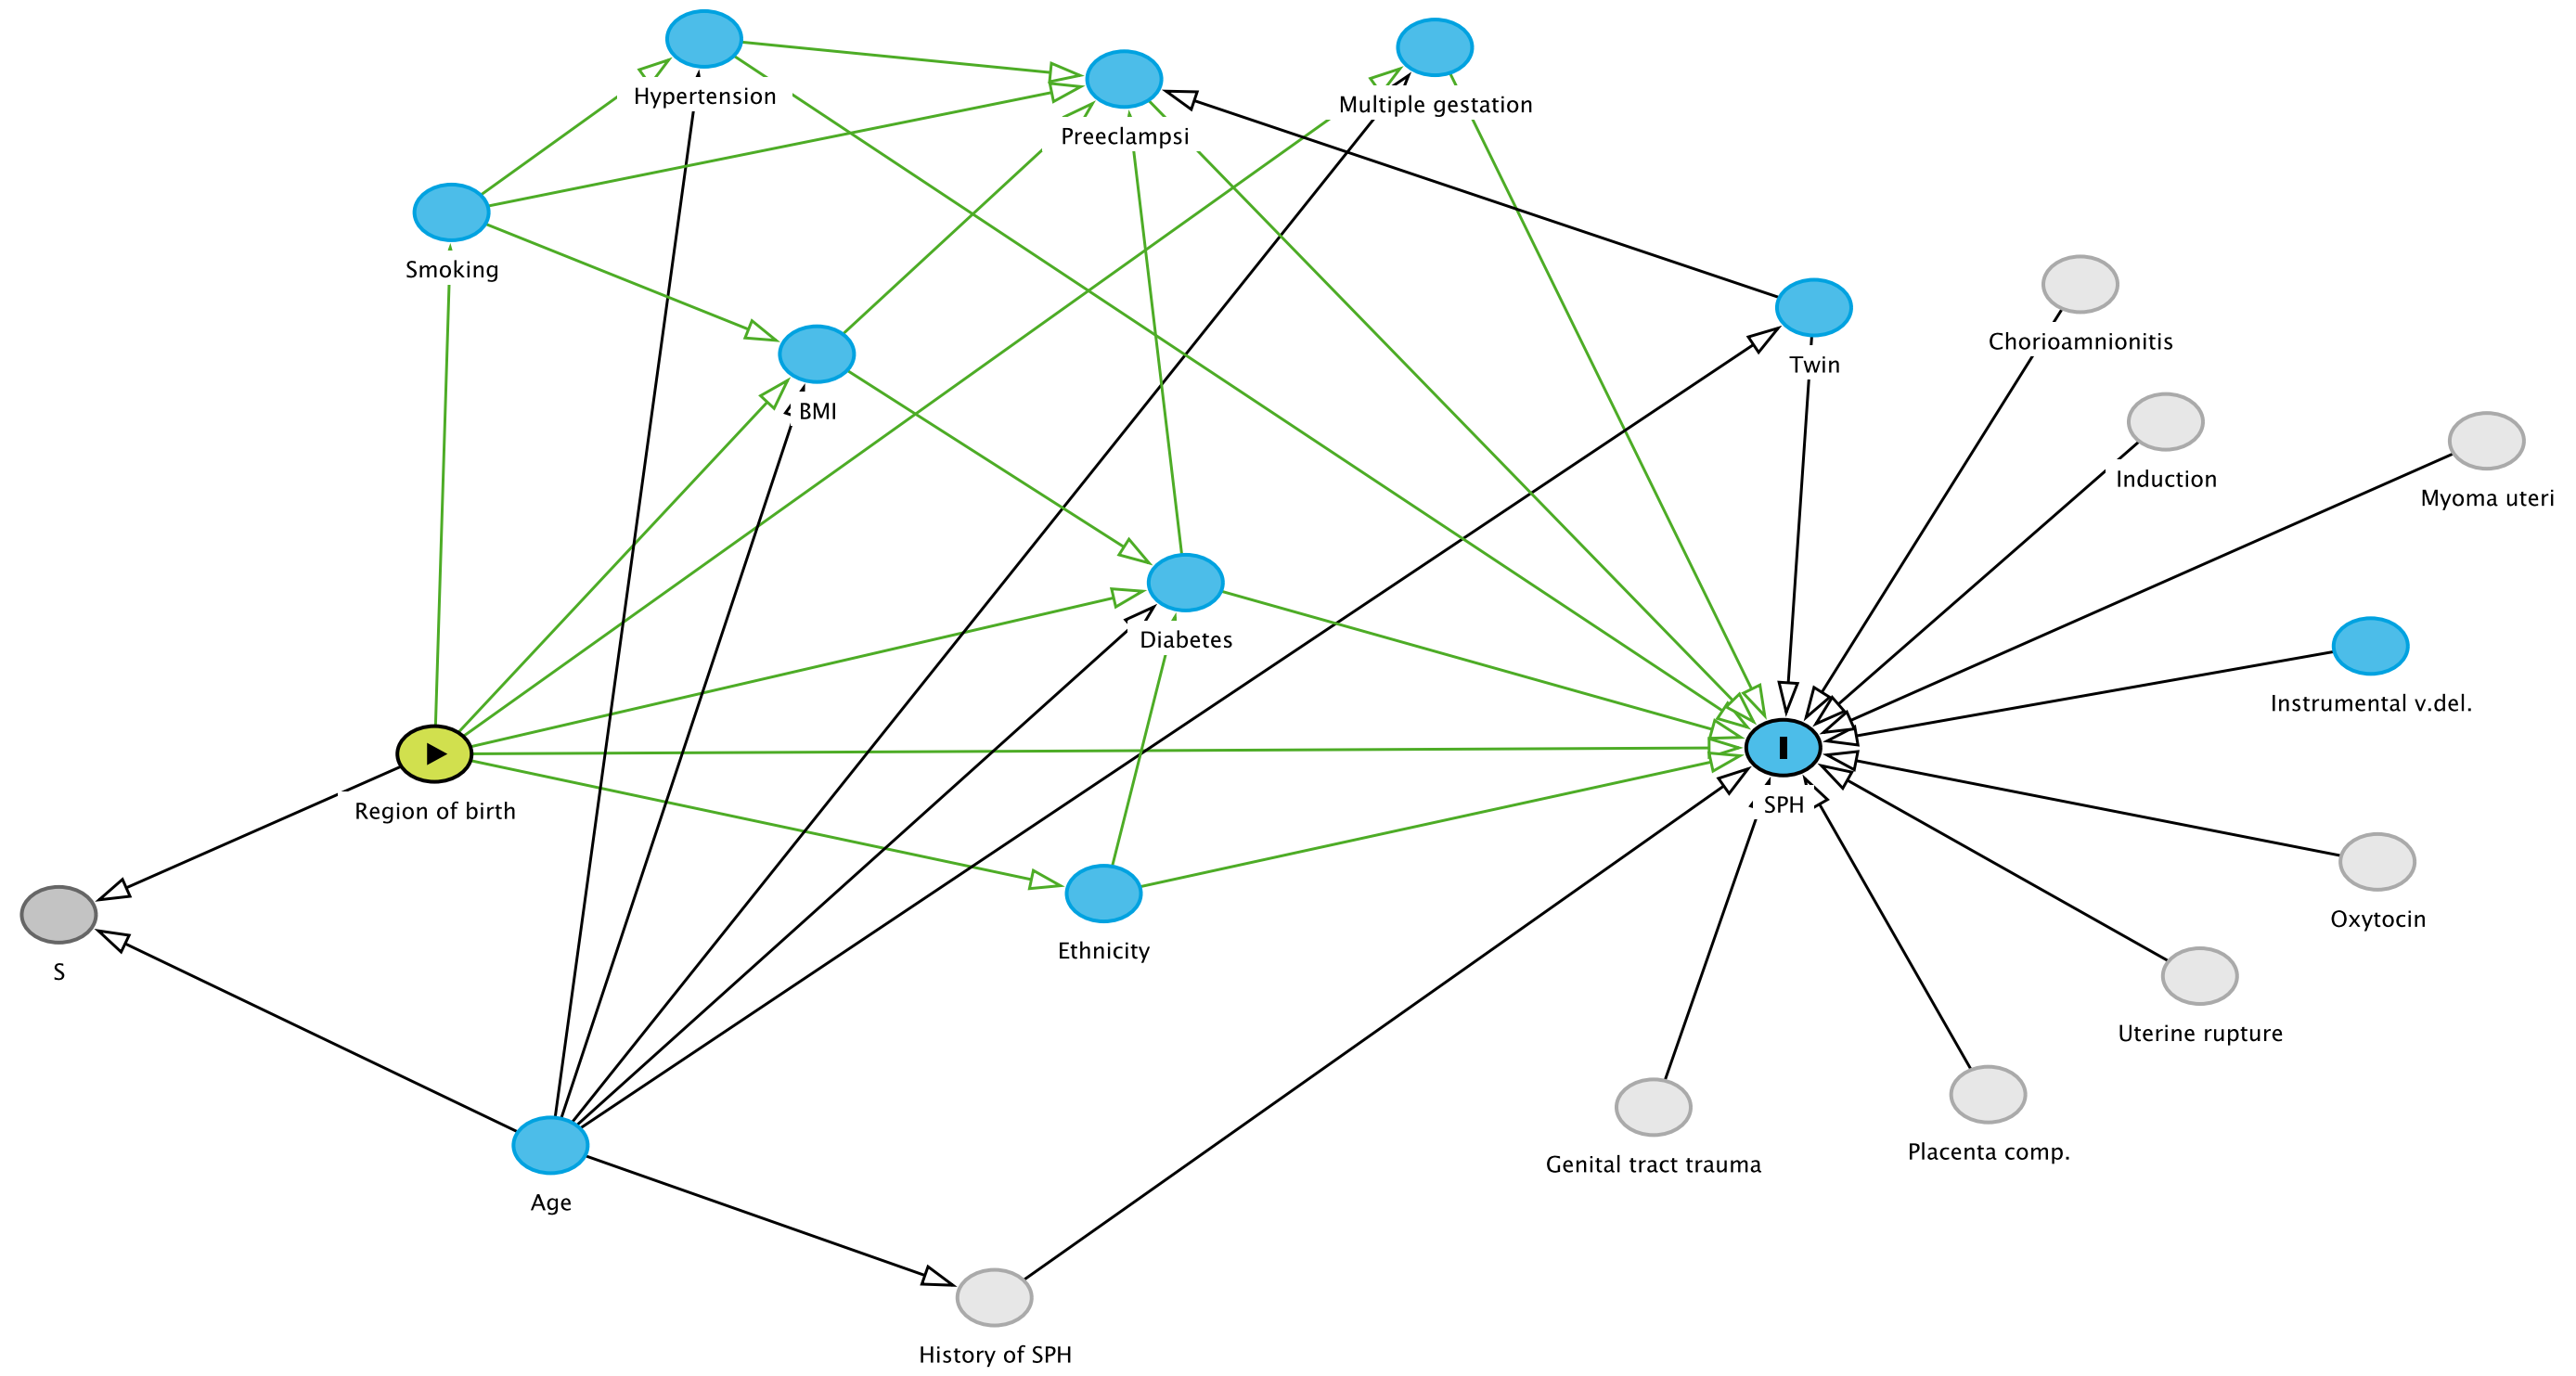

Supplement: MOESM1 [file 23636536]
